# Supplementary material for: The Relationship Between Father Involvement and Child Problem Behaviour in Intact Families: A 7-Year Cross-Lagged Study
Source: Springer Nature journal article supplement (doi:10.1007/s10802-015-0077-9), 2015-09-09
Supplement: MOESM4 [file 798040]

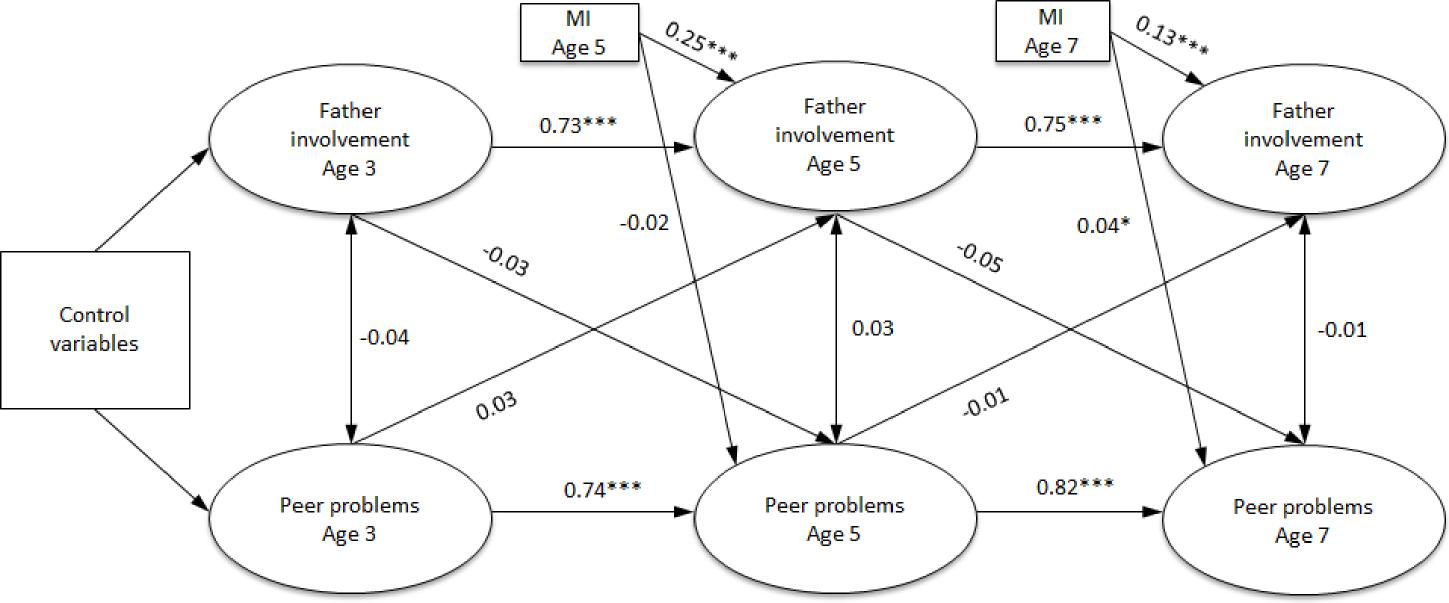


**Supplementary Figure 4. Cross-lagged model of father involvement and peer problems.**

Control variables (measured at age 9 months) are family poverty, paternal education, maternal and paternal psychological distress, mother-reported quality of the inter-parental relationship, and child’s sibship size, temperament, gender and ethnicity (Mixed, Indian, Pakistani/Bangladeshi, Black or ‘Other’ compared to White). MI = mother involvement. Regression coefficients are standardised.
